# Supplementary material
Source: PubMed Central journal article supplement (PMC3567821)
Supplement: cr2012159x2.pdf [file cr2012159x2.pdf]

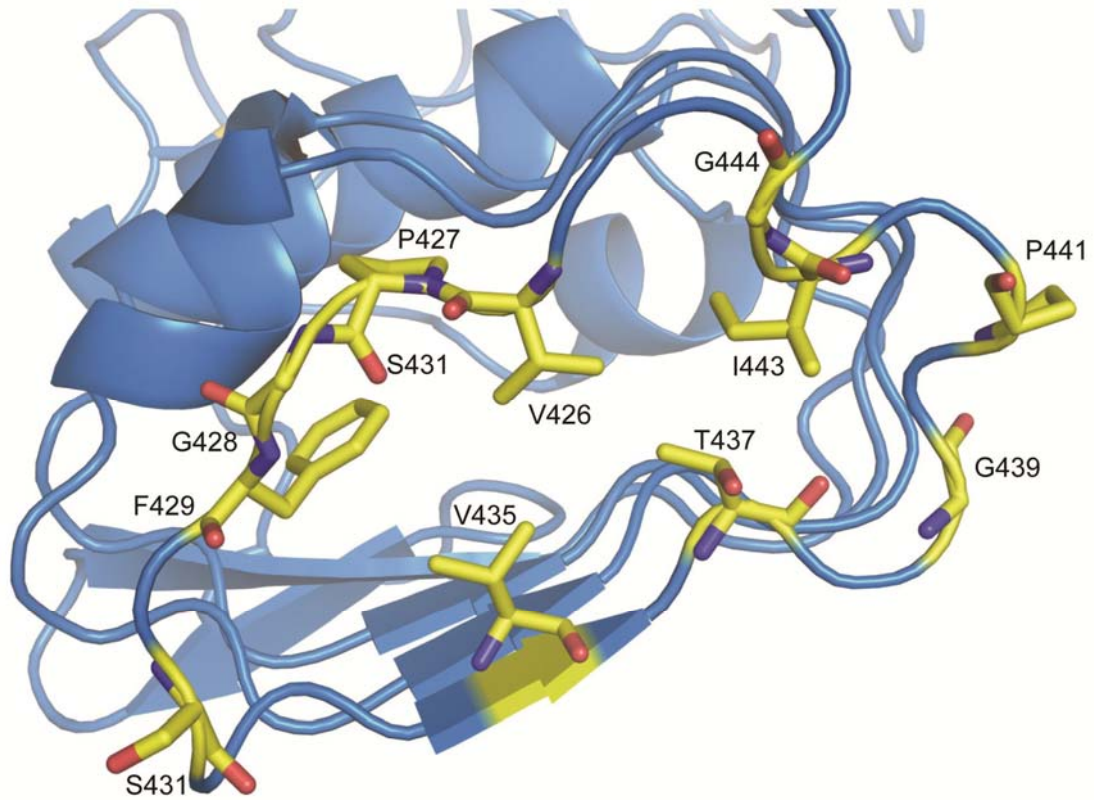

**Supplementary information, Figure S2**

Most of the carbonyl oxygen atoms from the last LRR of TMK1-LRR are solvent-exposed.

A close up view of the last LRR shown in cartoon. The residues with their carbonyl oxygen atoms solvent exposed are shown in stick and yellow and the oxygen atoms in red.
