# Supplementary material
Source: PubMed Central journal article supplement (PMC3567821)
Supplement: cr2012159x3.pdf [file cr2012159x3.pdf]

|                |   |   |   |   |   |   |   |   |   |   |   |   |   |   |   |   |   |   |   |   |   |   |   |   |   |   |   |   |
|----------------|---|---|---|---|---|---|---|---|---|---|---|---|---|---|---|---|---|---|---|---|---|---|---|---|---|---|---|---|
| LRR1(66-89)    | V | T | R | I | Q | I | G | H | S | G | L | Q | G | . | T | L | S | P | D | L | R | N | L | S | E | . | . | . |
| LRR2(90-112)   | L | E | R | L | E | L | Q | W | N | N | I | S | G | . | P | V | P | . | S | L | S | G | L | A | S | . | . | . |
| LRR3(113-136)  | L | Q | V | L | M | L | S | N | N | N | F | D | S | . | I | P | S | D | V | F | Q | G | L | T | S | . | . | . |
| LRR4(137-161)  | L | Q | S | V | E | I | D | N | N | P | F | K | S | W | E | I | P | E | S | L | R | N | A | S | A | . | . | . |
| LRR5(162-187)  | L | Q | N | F | S | A | N | S | A | N | V | S | G | . | S | L | P | . | G | F | L | G | P | D | E | F | P | G |
| LRR6(188-210)  | L | S | I | L | H | L | A | F | N | N | L | E | G | . | E | L | P | M | S | L | A | G | S | Q | . | . | . | . |
| LRR7(211-233)  | V | Q | S | L | W | L | N | G | Q | K | L | T | G | . | D | I | T | . | V | L | Q | N | M | T | G | . | . | . |
| LRR8(234-256)  | L | K | E | V | W | L | H | S | N | K | F | S | G | . | P | L | P | . | D | F | S | G | L | K | E | . | . | . |
| LRR9(257-280)  | L | E | S | L | S | L | R | D | N | S | F | T | G | . | P | V | P | A | S | L | L | S | L | E | S | . | . | . |
| LRR10(281-301) | L | K | V | V | N | L | T | N | N | H | L | Q | G | . | P | V | P | . | V | F | K | S | S | . | . | . | . | . |
| LRR11(363-387) | I | T | V | I | S | L | E | K | M | E | L | T | G | . | T | I | S | P | E | F | G | A | I | K | S | . | . | . |
| LRR12(388-411) | L | Q | R | I | I | L | G | I | N | N | L | T | G | . | M | I | P | Q | E | L | T | T | L | P | N | . | . | . |
| LRR13(412-432) | L | K | T | L | D | V | S | S | N | K | L | F | G | . | K | V | P | . | G | F | R | S | N | . | . | . | . | . |

### Supplementary information, Figure S3

Sequence alignment of LRRs in TMK1

The boundary of each LRR is shown on its right. The conserved residues are shown with yellow background. The solid pink squares indicate the amino acids specific to plant LRR proteins.
