# Supplementary material
Source: PubMed Central journal article supplement (PMC3567821)
Supplement: cr2012159x4.pdf [file cr2012159x4.pdf]

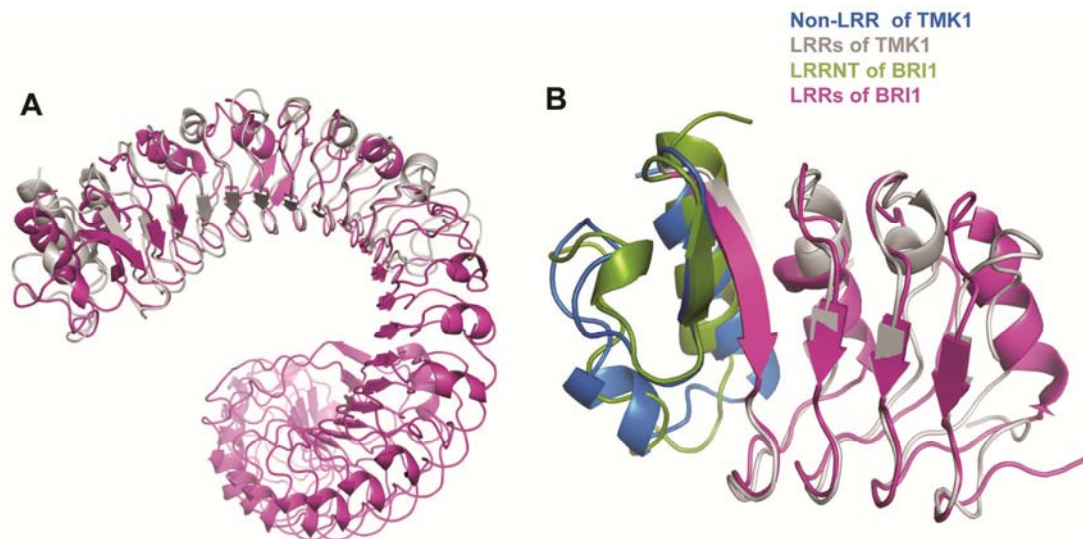

#### Supplementary information, Figure S4

Structural superposition of TMK1-LRR and BRI1-LRR

- A. The structure of the N-LRR of TMK1 resembles that of an N-terminal portion of BRI1. Structures containing residues 24-321 from TMK1 and residues 30-329 from BRI1 were used for structural alignment. Color codes are indicated in (B).
- B. The structure of the C-LRR of TMK1 is similar to that of an N-terminal portion of BRI1. Shown in the figure is structure superposition of TMK1 (residues 322-447) and BRI1 (residues 30-162). Non-LRR of TMK1, LRRs of TMK1, LRRNT of BRI1 and LRRs of BRI1 are shown in colors as indicated. The r.m.s.d of is 1.95 Å over aligned 116 C $\alpha$  atoms.
