# Supplementary material
Source: PubMed Central journal article supplement (PMC3567821)
Supplement: cr2012159x5.pdf [file cr2012159x5.pdf]

## Supplementary information, Table S1

Summary of diffraction data and structure refinement statistics

---

### Data Collection Statistics

|                       |                                                                                                        |
|-----------------------|--------------------------------------------------------------------------------------------------------|
| Beam Line             | Beam line BL17U1, SSRF                                                                                 |
| Space Group           | P1                                                                                                     |
| Wavelength (Å)        | 1.0                                                                                                    |
| Number of Reflections | 62,721 (3,132)                                                                                         |
| Cell dimensions       | a=43.19 Å, b=50.51 Å, c=61.84 Å<br>$\alpha=98.85^\circ$ , $\beta=108.74^\circ$ , $\gamma=108.10^\circ$ |
| Resolution (Å)        | 1.55 (1.58-1.55)                                                                                       |
| R <sub>sym</sub> (%)  | 6.2 (45.4)                                                                                             |
| I/ $\sigma$ (I)       | 20.8 (3.0)                                                                                             |
| Completeness (%)      | 96.0 (94.3)                                                                                            |
| Redundancy            | 3.9                                                                                                    |

### Refinement Statistics

|                              |                       |
|------------------------------|-----------------------|
| Resolution (Å)               | 50.0-1.55 (1.57-1.55) |
| No. Reflections              | 62,714 (2,486)        |
| Rwork/Rfree %                | 16.9/19.0 (24.5/29.2) |
| All protein atoms            | 3214                  |
| R.m.s deviations             |                       |
| Bond lengths (Å)             | 0.004                 |
| Bond angles (°)              | 0.987                 |
| Ramachandran (%) (from COOT) |                       |
| Preferred region             | 93.13                 |
| Allowed region               | 6.87                  |

---

Highest resolution shell is shown in parenthesis
